# Supplementary material
Source: publisher site journal article supplement (https://static.cambridge.org/content/id/urn:cambridge.org:id:article:S2050124222000376/resource/name/S2050124222000376supp001.r)
Supplement: Supplementary file 1 [file S2050124222000376supp001.r]

# # Documentation ----
# # DyNAMRE_supplementary.R
# # R Versions: 4.2.0
# #
# # Author(s): Uzaheta Alvaro
# #
# #
# # Description: Companion R code for the application presented in the
# #   paper: Uzaheta et al. (2023) "Dynamic Network Actor Models", Network 
# #   Science 
# #   The code uses R data objects prepared to run models with the
# #   R package goldfish.
# #   After the data preparation step, the code shows how to create
# #   a data object to draw samples from the posterior distribution 
# #   using cmdstanr and the Stan code prepared for the paper.
# #   Later, it shows the computation of the marginal log-likelihood
# #   using the quadrature approximation.
# #

# packages installation ----
install.packages("remotes")
remotes::install_github("snlab-ch/goldfish.latent")

library(goldfish.latent)

# user should install cmdstan before,
#   follow cmdstanr documentation for it
# cmdstanr::install_cmdstan()

# preparing data for goldfish ----
# # nodes: label and actors' covariates like:
#   oldTime (a_2): lifetime in years of user account
#     at time t_0
#   logOutdegLikeU: actors log out-degree at time t_0
#   shotsD: dummy variable of whether user had published
#     work pieces at time t
# # usersShotsEventD: data frame indicating the time when a user
#     published a work piece for first time.
#     Users who didn't publish work pieces are not part of
#     the choice set.
#     Columns: label, time, replace. With replace taking value 1
usersNode <- defineNodes(usersNode) |>
  within({
    logOutdegLikeU <- (logOutdegLikeU - mean(logOutdegLikeU)) /
      sd(logOutdegLikeU)
    oldTime <- (oldTime - mean(oldTime)) / sd(oldTime)
  }) |>
  linkEvents(usersNode,
             changeEvents = usersShotsEventD,
             attribute = "shotsD")

# # followNet: adjacency matrix of follow ties at time t_0
#   There is a tie from user i to user j if user i follows user j
#     on the platform
# # followEvent: data frame with follow events. sender, receiver,
#     time, replace.
#     replace always always takes value 1 when sender follows
#     the receiver on the platform
followNet <- defineNetwork(followNet, nodes = usersNode,
                           directed = TRUE) |>
  linkEvents(changeEvents = followEvent, nodes = usersNode)

# # likesNet: weighted adjacency matrix of likes ties at time t_0
#   There is a tie from user i to user j if user i liked user j
#   pieces of work on the platform.
#   The weight value is the number of likes user i had given
#     to user j.
# # likesEvent: data frame with likes events. sender, receiver,
#     time, increment.
#     increment always always takes value 1 when a new like event
#     from sender to the receiver happen on the platform
likesNet <- defineNetwork(likesNet, nodes = usersNode,
                          directed = TRUE) |>
  linkEvents(changeEvents = likesEvent, nodes = usersNode)

# # define the dependent events as the like events
likeDep <- defineDependentEvents(
  events = likesEvent,
  nodes = usersNode,
  defaultNetwork = likesNet
)

# models with random effects ----
# # Mod02
mod02Data <- CreateData(
  randomEffects = list(inertia ~ 1),
  fixedEffects =
    likeDep ~ tie(followNet) + recip(followNet) + recip(likesNet),
  supportConstraint = ~ alter(usersNode$shotsD)
)

# Draw samples from the posterior distribution
# for models (2) to (4)
stanCode <- CreateModelCode(mod02Data)
modRandomEffects <- cmdstan_model(stanCode)

# draw samples from the posterior distribution
mod02Samples <- modRandomEffects$sample(
  data = mod02Data[["dataStan"]],
  parallel_chains = 8, chains = 8,
  iter_warmup = 500, iter_sampling = 1250
)

# marginal likelihood using Gauss-Hermite approximation
# as introduced by Merkle et al.-2019
# it's possible to compute the conditional version
#   changing the argument `type` to `type = "conditional"`
mod02Mll <- ComputeLogLikelihood(
  mod02Samples, mod02Data, type = "marginal", spec = 8
)

# waic and loo computation
library(loo)
mod02waic <- waic(mod02Mll)

relEff <- relative_eff(exp(mod02Mll))
mod02loo <- loo(mod02Mll, r_eff = relEff)


# # Mod03
mod03Data <- CreateData(
  randomEffects = list(inertia ~ ego(usersNode$logOutdegLikeU)),
  fixedEffects =
    likeDep ~ tie(followNet) + recip(followNet) + recip(likesNet),
  supportConstraint = ~ alter(usersNode$shotsD)
)

# draw samples from the posterior distribution
mod03Samples <- modRandomEffects$sample(
  data = mod03Data[["dataStan"]],
  parallel_chains = 8, chains = 8,
  iter_warmup = 500, iter_sampling = 1250
)

# marginal likelihood using Gauss-Hermite approximation
mod03Mll <- ComputeLogLikelihood(
  mod03Samples, mod03Data, spec = 8
)

# waic and loo computation
mod03waic <- waic(mod03Mll)

relEff <- relative_eff(exp(mod03Mll))
mod03loo <- loo(mod03Mll, r_eff = relEff)

# # Mod04
mod04Data <- CreateData(
  randomEffects = list(inertia ~ ego(usersNode$oldTime)),
  fixedEffects =
    likeDep ~ tie(followNet) + recip(followNet) + recip(likesNet),
  supportConstraint = ~ alter(usersNode$shotsD)
)

# draw samples from the posterior distribution
mod04Samples <- modRandomEffects$sample(
  data = mod04Data[["dataStan"]],
  parallel_chains = 8, chains = 8,
  iter_warmup = 500, iter_sampling = 1250
)

# marginal likelihood using Gauss-Hermite approximation
mod04Mll <- ComputeLogLikelihood(
  mod04Samples, mod04Data, spec = 8
)
# waic and loo computation
mod04waic <- waic(mod04Mll)

relEff <- relative_eff(exp(mod04Mll))
mod04loo <- loo(mod04Mll, r_eff = relEff)
